# Supplementary material for: Magnetic Core-Shell Iron Oxides-Based Nanophotocatalysts and Nanoadsorbents for Multifunctional Thin Films
Source: MDPI journal article supplement (doi:10.3390/membranes12050466), 2022-04-26
Supplement: s1 [file s1]

## SUPPLEMENTARY INFORMATION

### Magnetic Core-Shell Iron Oxides-based Nanophotocatalysts and Nanoadsorbents for Multifunctional Thin Films and Membranes

Viorica MUȘAT<sup>1\*</sup>, Nicolae STĂNICĂ<sup>2</sup>, Elena Maria ANGHEL<sup>2\*</sup>, Irina ATKINSON<sup>2</sup>, Dana CULIȚĂ<sup>2</sup>, Silviu POLOȘAN<sup>3</sup>, Lenuța CRINTEA (CĂPĂȚĂNĂ)<sup>1</sup>, Alina CANTARAGIU CIOROMILĂ<sup>4</sup>, Cristian-Teodor BURUIANĂ<sup>5</sup> and **Oana CARP**<sup>2</sup>

*\*Corresponding authors: viorica.musat@ugal.ro, manghel@icf.ro*

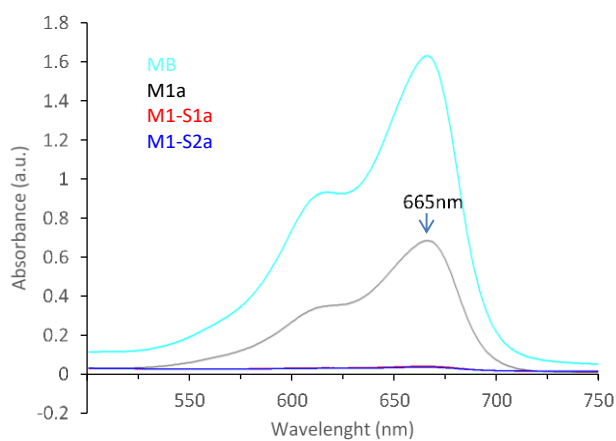

<sup>1</sup>Corresponding authors. *E-mail address:* viorica.musat@ugal.ro (Viorica Musat), manghel@icf.ro (Elena Maria Anghel )

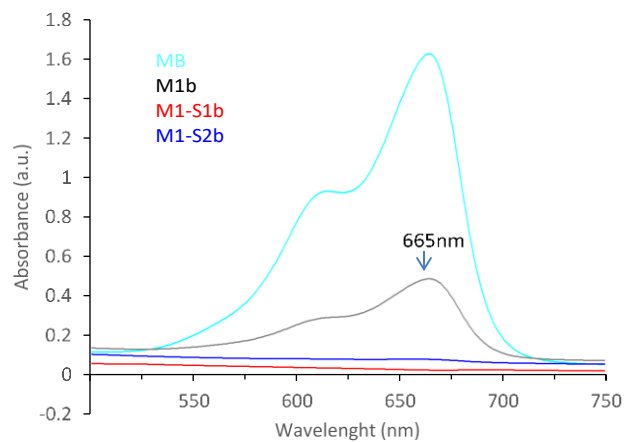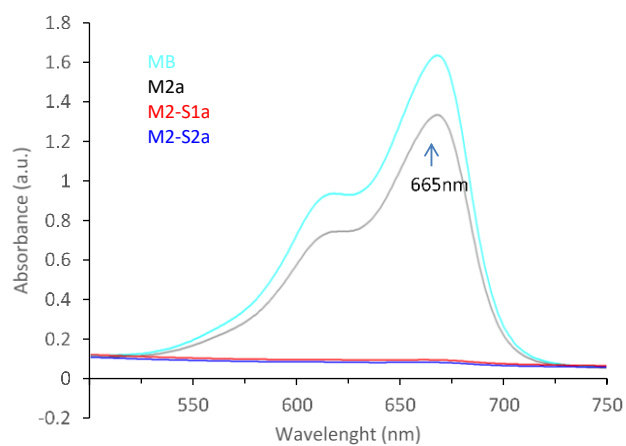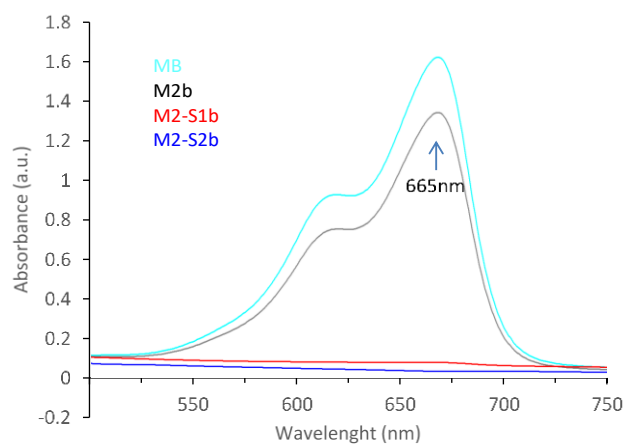

**Figure S1:** Absorbance spectra of the MB solution, before and after 120 min exposure to UV (a) and dark (b) in the presence of investigated samples

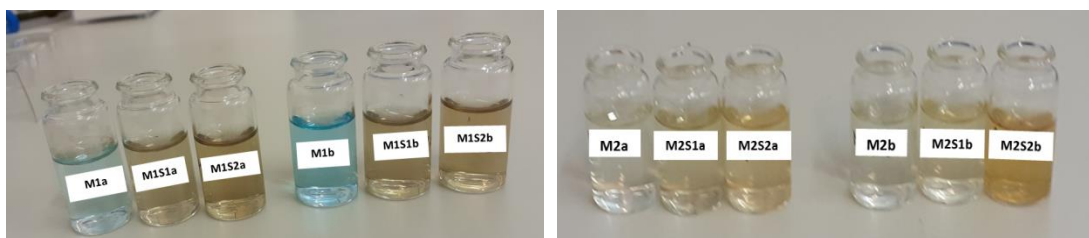

**Figure S2:** Digital picture of MB recovered from supernatant-water-investigated samples (photocatalytic test 120 min. exposure to UV (a) and dark (b))

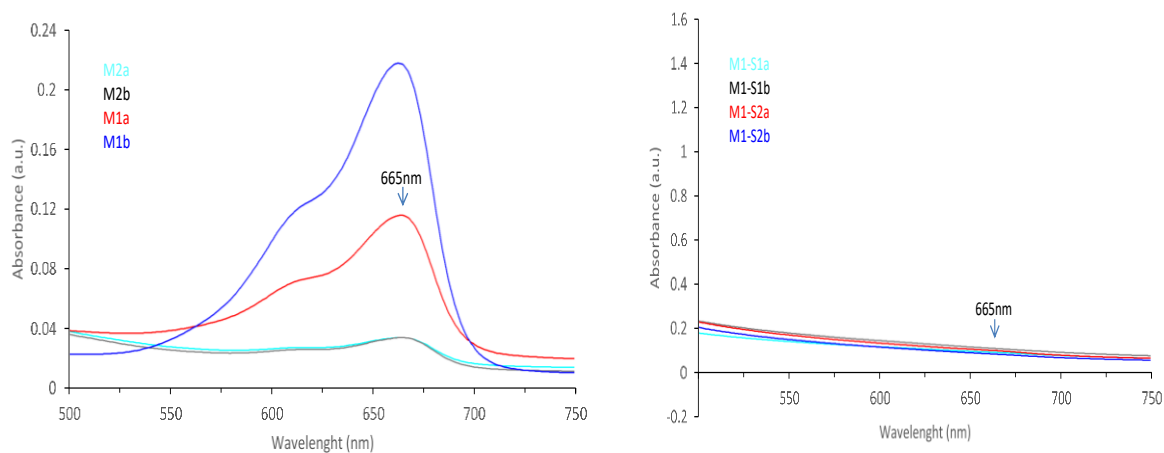

**Figure S3:** Absorbance spectra of the MB recovered solution from supernatante-water-M1/ M2 and corresponding to the core-shell (M1-S1/2 and M2-S1/2) nanopowders exposed to UV (a) or dark (b)
